# Supplementary material for: Impact of the COVID-19 Pandemic on the Behavioral Health of People With Intellectual and Developmental Disabilities
Source: Atypon-hosted journal article supplement (doi:10.1176/appi.ps.202100524), 2022-06-23
Supplement: appi.ps.202100524.ds001.pdf [file appi.ps.202100524.ds001.pdf]

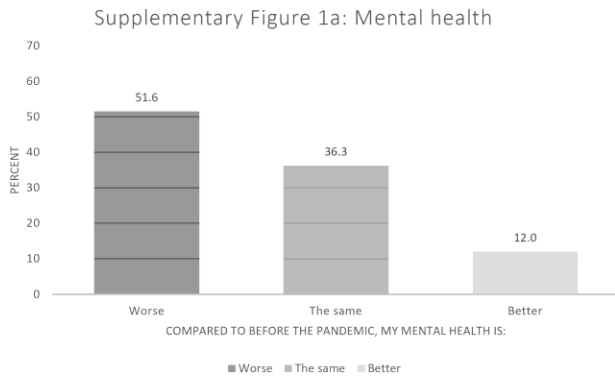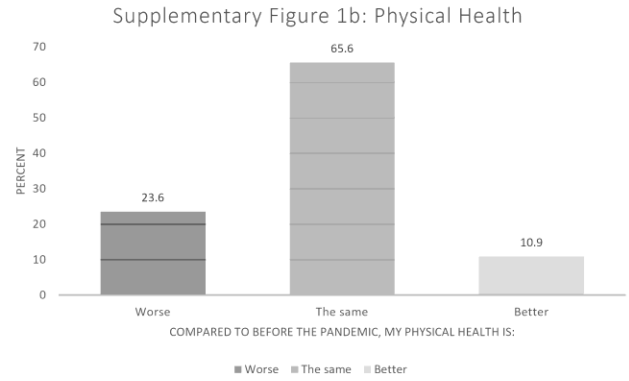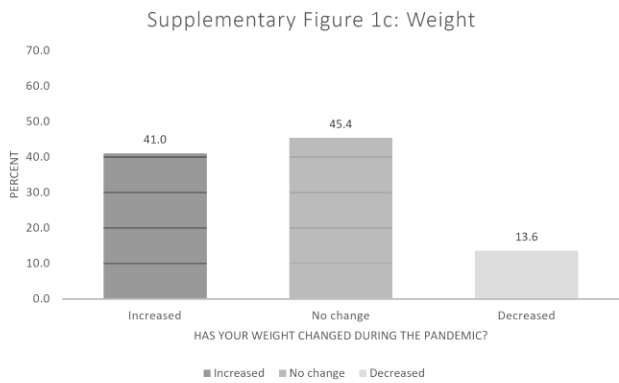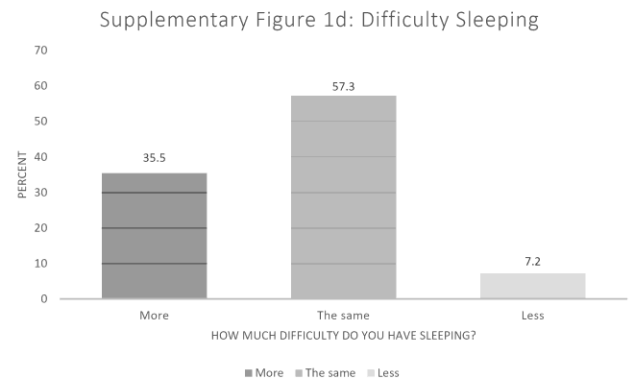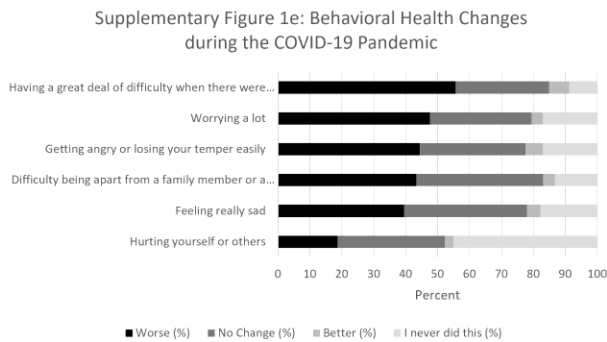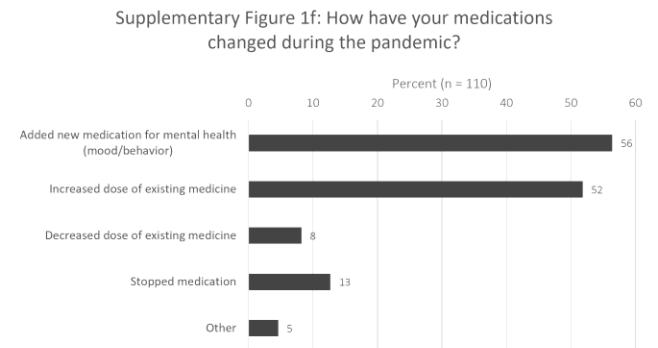

**Supplementary Table 1: Study Population Demographics**

|                              |             |
|------------------------------|-------------|
| Age (median (years), [IQR])  | 25 [13, 38] |
| % peditrics (less than 18yo) | 35%         |
| Gender (% female)            | 47%         |
| Race (% , n = 303)           |             |

|                                                        |      |
|--------------------------------------------------------|------|
| White                                                  | 82%  |
| Black/African                                          | 6%   |
| Asian                                                  | 7%   |
| Hispanic/Latinx                                        | 8%   |
| Native American                                        | 1%   |
| Pacific Islander                                       | < 1% |
| Prefer not to answer                                   | 2%   |
| State (% , n = 424)                                    |      |
| Colorado                                               | 44%  |
| New York                                               | 24%  |
| Other                                                  | 33%  |
| Living arrangement if >= 18 years old (% , n = 269)    |      |
| With family                                            | 64%  |
| In a group home or congregate setting                  | 17%  |
| Supported independent living (in a house or apartment) | 8%   |
| Alone                                                  | 7%   |
| Other                                                  | 4%   |
| Type of living community (% , n = 431)                 |      |

|                                               |     |
|-----------------------------------------------|-----|
| In a city (urban)                             | 30% |
| In a suburb (outside a city)                  | 59% |
| Rural                                         | 12% |
| Developmental disability (% checked, n = 429) |     |
| Intellectual Disability                       | 52% |
| Autism Spectrum Disorder                      | 49% |
| Cerebral Palsy                                | 15% |
| Other mobility impairment                     | 9%  |
| Down syndrome                                 | 18% |
| Hearing impairment                            | 10% |
| Visual impairment                             | 9%  |
| Other developmental disability                | 27% |
| Other diagnoses (% checked, n = 292)          |     |
| Anxiety                                       | 63% |
| Depression                                    | 29% |
| Obsessive Compulsive Disorder                 | 21% |
| Epilepsy                                      | 20% |
| Dementia                                      | 1%  |



|                                           |          |        |         |        |          |        |          |        |
|-------------------------------------------|----------|--------|---------|--------|----------|--------|----------|--------|
| Socializing with friends or family        | -0.2042  | <.0001 | 0.13053 | 0.0072 | -0.0724  | 0.1371 | -0.04791 | 0.325  |
| Sports/Exercise (like Special Olympics)   | -0.19372 | 0.0005 | 0.18486 | 0.001  | -0.12787 | 0.0237 | -0.15206 | 0.0069 |
| Volunteering                              | -0.35429 | <.0001 | 0.26857 | 0.0003 | -0.13508 | 0.0739 | -0.13635 | 0.0703 |
| Medical Care (Doctor's Visits)            | -0.03375 | 0.496  | 0.08813 | 0.0754 | -0.06161 | 0.2148 | -0.06884 | 0.1652 |
| Special Education                         | -0.03292 | 0.6654 | 0.13953 | 0.0671 | -0.23191 | 0.0021 | -0.0306  | 0.6877 |
| Day programming/Supports in the community | -0.20485 | 0.0008 | 0.11632 | 0.0572 | -0.1454  | 0.0177 | -0.13003 | 0.034  |
| Recreation/leisure activities             | -0.18088 | 0.0002 | 0.09626 | 0.0503 | 0.0105   | 0.8313 | -0.03471 | 0.4807 |
| Paid Work/Employment                      | -0.20783 | 0.0102 | 0.18807 | 0.0212 | 0.00832  | 0.9195 | -0.28869 | 0.0003 |
| Occupational/Physical/Speech Therapy      | -0.05792 | 0.356  | 0.08427 | 0.1798 | -0.19001 | 0.0023 | 0.01374  | 0.8268 |
| Mental Health Care                        | -0.1322  | 0.0476 | 0.03587 | 0.5942 | -0.13173 | 0.0484 | -0.14845 | 0.0263 |

**Supplementary Table 4: Sample Sizes for Correlations with Loss of Activities and Services**

|                                           | Mental Health | Screen Time | Exercise | Sleep | Help |
|-------------------------------------------|---------------|-------------|----------|-------|------|
| Socializing with friends or family        | 426           | 425         | 423      | 423   | 424  |
| Sports/Exercise (like Special Olympics)   | 317           | 316         | 314      | 313   | 314  |
| Volunteering                              | 178           | 177         | 176      | 176   | 177  |
| Medical Care (Doctor's Visits)            | 411           | 409         | 408      | 407   | 408  |
| Special Education                         | 175           | 175         | 173      | 173   | 175  |
| Day programming/Supports in the community | 268           | 267         | 268      | 266   | 266  |
| Recreation/leisure activities             | 417           | 416         | 414      | 414   | 415  |
| Paid Work/Employment                      | 152           | 152         | 150      | 150   | 150  |
| Occupational/Physical/Speech Therapy      | 255           | 256         | 255      | 255   | 256  |
| Mental Health Care                        | 225           | 225         | 223      | 225   | 224  |

**Supplementary Table 5: Changes in Service Availability Between Children (<18) and Adults**

|                                                | I continue to do this. | I continue to do this, but less because of COVID. | I used to do this, but now I cannot because of COVID. | Total | p-value |
|------------------------------------------------|------------------------|---------------------------------------------------|-------------------------------------------------------|-------|---------|
| <b>Socializing with friends or family</b>      |                        |                                                   |                                                       |       |         |
| Children                                       | 15                     | 89                                                | 46                                                    | 150   | 0.2633  |
| Adults                                         | 41                     | 143                                               | 85                                                    | 269   |         |
| <b>Sports/Exercise (like Special Olympics)</b> |                        |                                                   |                                                       |       |         |
| Children                                       | 8                      | 29                                                | 55                                                    | 92    | 0.967   |
| Adults                                         | 21                     | 68                                                | 129                                                   | 218   |         |
| <b>Volunteering</b>                            |                        |                                                   |                                                       |       |         |
| Children                                       | 4                      | 7                                                 | 13                                                    | 24    | 0.6522  |
| Adults                                         | 18                     | 36                                                | 95                                                    | 149   |         |
| <b>Medical Care (Doctor's Visits)</b>          |                        |                                                   |                                                       |       |         |
| Children                                       | 73                     | 59                                                | 10                                                    | 142   | 0.8318  |

|                                                  |     |     |     |     |        |
|--------------------------------------------------|-----|-----|-----|-----|--------|
| Adults                                           | 129 | 116 | 16  | 261 |        |
| <b>Special Education</b>                         |     |     |     |     |        |
| Children                                         | 68  | 62  | 15  | 145 | 0.0864 |
| Adults                                           | 8   | 16  | 6   | 30  |        |
| <b>Day programming/Supports in the community</b> |     |     |     |     |        |
| Children                                         | 8   | 34  | 36  | 78  | 0.2643 |
| Adults                                           | 20  | 61  | 103 | 184 |        |
| <b>Recreation/leisure activities</b>             |     |     |     |     |        |
| Children                                         | 8   | 54  | 86  | 148 | 0.7695 |
| Adults                                           | 18  | 89  | 156 | 263 |        |
| <b>Paid Work/Employment</b>                      |     |     |     |     |        |
| Children                                         | 7   | 3   | 1   | 11  | 0.0295 |
| Adults                                           | 44  | 30  | 64  | 138 |        |
| <b>Occupational/Physical/Speech Therapy</b>      |     |     |     |     |        |
| Children                                         | 52  | 56  | 19  | 127 | 0.0843 |
| Adults                                           | 40  | 53  | 32  | 125 |        |
| <b>Mental Health Care</b>                        |     |     |     |     |        |
| Children                                         | 29  | 32  | 11  | 72  | 0.6618 |
| Adults                                           | 69  | 60  | 19  | 148 |        |

# Impact of the Pandemic on Behavioral Health of People with Intellectual and/or Developmental Disabilities (IDD)

Please complete the survey below.

Thank you!

## Please help us understand how the COVID-19 pandemic is affecting the behavioral health of patients with intellectual and/or developmental disabilities (I/DD).

Who is completing this survey?

- I am answering for myself. (I am a person with intellectual and/or developmental disabilities.)
- I am answering on behalf of a person with intellectual and/or developmental disabilities.

For all remaining questions, you are responding ON BEHALF OF the person with intellectual and/or developmental disabilities.

What is your gender identity?

- Man
- Woman
- Other

(Optional) What is your gender identity?

\_\_\_\_\_

What is your age (in years)?

\_\_\_\_\_

What is your race/ethnicity?

- White
- Black/African
- Asian
- Hispanic/Latinx
- Native American
- Pacific Islander
- Prefer not to answer

Please check all terms which describe your developmental disability.

- Intellectual Disability
- Autism Spectrum
- Cerebral Palsy
- Other mobility impairment
- Down syndrome
- Hearing impairment
- Visual impairment
- Other developmental disability

If other, please specify. (Optional)

\_\_\_\_\_

Please check any other diagnoses which apply to you.

- Anxiety
- Depression
- OCD
- Epilepsy
- Dementia
- Other diagnoses

If other, please specify. (Optional)

\_\_\_\_\_

---

What best describes the community where you live?

- In a CITY (Urban)
- In a SUBURB (outside a city)
- Rural

---

In which State do you live?

- Alabama
- Alaska
- Arizona
- Arkansas
- California
- Colorado
- Connecticut
- Delaware
- Florida
- Georgia
- Hawaii
- Idaho
- Illinois
- Indiana
- Iowa
- Kansas
- Kentucky
- Louisiana
- Maine
- Maryland
- Massachusetts
- Michigan
- Minnesota
- Mississippi
- Missouri
- Montana
- Nebraska
- Nevada
- New Hampshire
- New Jersey
- New Mexico
- New York
- North Carolina
- North Dakota
- Ohio
- Oklahoma
- Oregon
- Pennsylvania
- Rhode Island
- South Carolina
- South Dakota
- Tennessee
- Texas
- Utah
- Vermont
- Virginia
- Washington
- West Virginia
- Wisconsin
- Wyoming
- Washington D.C.
- Other

---

If other, please specify.

---



What is your living arrangement?

- With family  
 In a group home or congregate setting  
 Supported independent living (in a house or apartment)  
 Alone  
 Other

If other, please specify.

---

How would you rate your overall PHYSICAL health right now?

- Excellent  
 Good  
 Fair  
 Poor

Compared to before the pandemic, my physical health is:

- Worse  
 The same  
 Better

How would you rate your overall MENTAL health right now?

- Excellent  
 Good  
 Fair  
 Poor

Compared to before the pandemic, my MENTAL health is:

- Worse  
 The same  
 Better

Think about the challenges that you had IN THE PAST TWO WEEKS.

Please tell us how your challenges are DIFFERENT NOW compared to BEFORE the COVID pandemic.

|                                                                                  | Worse                 | No Change             | Better                | N/A (I never did this) |
|----------------------------------------------------------------------------------|-----------------------|-----------------------|-----------------------|------------------------|
| Worrying a lot                                                                   | <input type="radio"/> | <input type="radio"/> | <input type="radio"/> | <input type="radio"/>  |
| Feeling really sad                                                               | <input type="radio"/> | <input type="radio"/> | <input type="radio"/> | <input type="radio"/>  |
| Having a great deal of difficulty when there were changes in routine or schedule | <input type="radio"/> | <input type="radio"/> | <input type="radio"/> | <input type="radio"/>  |
| Difficulty being apart from a family member or a loved staff member.             | <input type="radio"/> | <input type="radio"/> | <input type="radio"/> | <input type="radio"/>  |
| Getting angry or losing your temper easily                                       | <input type="radio"/> | <input type="radio"/> | <input type="radio"/> | <input type="radio"/>  |
| Hurting yourself or others                                                       | <input type="radio"/> | <input type="radio"/> | <input type="radio"/> | <input type="radio"/>  |

Please share any OTHER difficulties you have had since the COVID-19 pandemic:

---

Did you take medication to manage these problems BEFORE the pandemic?

- Yes  
 No

Have any medications to manage these problems CHANGED since before the pandemic?

- Yes  
 No

How have your medications changed?

- Added new medication for MENTAL health (mood/behavior)  
 INCREASED dose of existing medicine  
 DECREASED dose of existing medicine  
 STOPPED medication  
 Other

(Optional): If OTHER,, please explain how your MEDICATIONS have CHANGED during the covid pandemic: \_\_\_\_\_

Please tell us how your services/activities have CHANGED because of the COVID pandemic.

|                                                                          | I continue to do this. | I continue to do this, but LESS because of COVID | I USED to do this, but now I CANNOT because of COVID. | I NEVER did this.     |
|--------------------------------------------------------------------------|------------------------|--------------------------------------------------|-------------------------------------------------------|-----------------------|
| Paid Work/Employment                                                     | <input type="radio"/>  | <input type="radio"/>                            | <input type="radio"/>                                 | <input type="radio"/> |
| Day programming/Supports in the community                                | <input type="radio"/>  | <input type="radio"/>                            | <input type="radio"/>                                 | <input type="radio"/> |
| Sports/Exercise (like Special Olympics)                                  | <input type="radio"/>  | <input type="radio"/>                            | <input type="radio"/>                                 | <input type="radio"/> |
| Occupational/Physical/Speech Therapy                                     | <input type="radio"/>  | <input type="radio"/>                            | <input type="radio"/>                                 | <input type="radio"/> |
| Mental Health Care                                                       | <input type="radio"/>  | <input type="radio"/>                            | <input type="radio"/>                                 | <input type="radio"/> |
| Medical Care (Doctor's Visits)                                           | <input type="radio"/>  | <input type="radio"/>                            | <input type="radio"/>                                 | <input type="radio"/> |
| Volunteering                                                             | <input type="radio"/>  | <input type="radio"/>                            | <input type="radio"/>                                 | <input type="radio"/> |
| Socializing with friends or family                                       | <input type="radio"/>  | <input type="radio"/>                            | <input type="radio"/>                                 | <input type="radio"/> |
| Recreation/leisure activities (like going to the movies/bowling/hobbies) | <input type="radio"/>  | <input type="radio"/>                            | <input type="radio"/>                                 | <input type="radio"/> |
| Special Education (Individualized Education Plan, IEP, services)         | <input type="radio"/>  | <input type="radio"/>                            | <input type="radio"/>                                 | <input type="radio"/> |

Please share additional thoughts about how your services/activities have CHANGED because of the COVID pandemic: \_\_\_\_\_

How much would the following IMPROVE your BEHAVIORAL HEALTH during the pandemic?

|                                                                                  | Would not help at all | Would help a little bit | Would help somewhat   | Would help very much  |
|----------------------------------------------------------------------------------|-----------------------|-------------------------|-----------------------|-----------------------|
| Continuous access to a day program or job                                        | <input type="radio"/> | <input type="radio"/>   | <input type="radio"/> | <input type="radio"/> |
| Access to activities in the community (like shopping, going to the mall, sports) | <input type="radio"/> | <input type="radio"/>   | <input type="radio"/> | <input type="radio"/> |
| Fewer changes in support staff                                                   | <input type="radio"/> | <input type="radio"/>   | <input type="radio"/> | <input type="radio"/> |

- |                                                                                      |                       |                       |                       |                       |
|--------------------------------------------------------------------------------------|-----------------------|-----------------------|-----------------------|-----------------------|
| Access to behavioral therapy                                                         | <input type="radio"/> | <input type="radio"/> | <input type="radio"/> | <input type="radio"/> |
| More time with friends/family                                                        | <input type="radio"/> | <input type="radio"/> | <input type="radio"/> | <input type="radio"/> |
| More time outdoors                                                                   | <input type="radio"/> | <input type="radio"/> | <input type="radio"/> | <input type="radio"/> |
| Access to religious services (like church, temple, mosque, other spiritual practice) | <input type="radio"/> | <input type="radio"/> | <input type="radio"/> | <input type="radio"/> |

---

Please share anything else that would HELP you DURING the pandemic:

---



---

COMPARED to BEFORE the pandemic:

- |                                                                                           | less                  | the same              | more                  |
|-------------------------------------------------------------------------------------------|-----------------------|-----------------------|-----------------------|
| How much HELP do you NOW need getting dressed, brushing your teeth, showering, or eating? | <input type="radio"/> | <input type="radio"/> | <input type="radio"/> |
| How much difficulty do you have sleeping?                                                 | <input type="radio"/> | <input type="radio"/> | <input type="radio"/> |
| How much do you exercise?                                                                 | <input type="radio"/> | <input type="radio"/> | <input type="radio"/> |
| How much time are you spending watching TV, or other screen time?                         | <input type="radio"/> | <input type="radio"/> | <input type="radio"/> |

---

During the pandemic:

---

Have you been able to use video technology such as ZOOM, Skype, FaceTime, or any other video programs to ACCESS activities or services?

- Yes  
 No

---

Do you PREFER having MEDICAL APPOINTMENTS in-person or by video?

- In-person  
 Video  
 Other

---

If OTHER, please explain:

---



---

Do you PREFER having SERVICES/ACTIVITIES (like day program, job training) in-person or by video?

- In-person  
 Video  
 Other

---

If OTHER, please explain:

---



---

How much are you doing VIRTUAL social activities?

- Never  
 Once a month  
 Once a week  
 Every day  
 Other  
 ((For example, Zoom, FaceTime, or other video applications.))

---

Do you feel your SOCIAL needs are being met with the virtual options available?  Yes  
 No

---

(OPTIONAL) Tell us more about your social needs during the pandemic and how they are/are not being met. \_\_\_\_\_

---

Has your WEIGHT changed during the pandemic?  Decreased  
 No change  
 Increased

---

How much DIFFICULTY do you have wearing a MASK when you leave the house?  NO difficulty  
 A LITTLE BIT of difficulty  
 A LOT of DIFFICULTY  
 IMPOSSIBLE to wear a mask

---

If wearing a mask is difficult, why?  Sensory challenges  
 Anxiety  
 Breathing problems  
 Other

---

OTHER: \_\_\_\_\_

---

Has difficulty wearing a mask prevented you from participating in ACTIVITIES or being able to access SERVICES?  Yes  
 No

---

Have you been diagnosed with COVID-19 since the pandemic began?  Yes  
 No

---

If so, were you admitted to a hospital overnight or longer?  Yes  
 No

---

If so, did you require a VENTILATOR (breathing machine) to help you breathe during your illness?  Yes  
 No

---

Do you have any ongoing health problems as a result of illness from COVID-19?  Yes  
 No

---

If yes, ongoing health problems include:  Breathing problems  
 Fatigue/feeling tired  
 Stroke  
 Weakness  
 Walking problems  
 Other

---

If other, please specify \_\_\_\_\_

---

Is there anything you want to share about your experience being ill with COVID-19? \_\_\_\_\_

---

Has a caregiver or family member been diagnosed with COVID-19 since the beginning of the pandemic?  Yes  
 No

---

Have you received a vaccine against COVID-19?  Yes  
 No

---

---

If so - when did you receive your first vaccine injection?  
XX/XX/XXXX (please give your best guess if you don't remember the exact date)

---

---

Do you plan to get a COVID vaccine when it becomes available to you?

- Yes
- No

---

Why or why not?

---

---

Please share with us any thoughts about how your life has changed since the COVID-19 pandemic.

---

---

Is there anything you would like to tell us about this survey?

---

---

Thank you for taking our survey! We would like to follow up with you in 3 to 6 months. If you are willing, please provide your email. Email will be kept confidential and will only be used for the purpose of the survey.

---

E-mail address:

---
